# Supplementary material
Source: HighWire-hosted journal article supplement (https://erj.ersjournals.com/highwire/filestream/131029/field_highwire_adjunct_files/4/ERJ-02049-2015_Appendix_5.pdf)
Supplement: ERJ-02049-2015_Appendix_5.pdf [file ERJ-02049-2015_Appendix_5.pdf]

## Appendix 5. Coverage of Lung Cancer Standard Set outcome domains by common patient-reported outcome measures.

| Instrument                     | Specifications |                                 |                        |                 |                               | Outcome domains in Lung Cancer Standard Set |      |         |                      |                    |                       |                       |                     |       |
|--------------------------------|----------------|---------------------------------|------------------------|-----------------|-------------------------------|---------------------------------------------|------|---------|----------------------|--------------------|-----------------------|-----------------------|---------------------|-------|
|                                | Year developed | Validated against LC population | Number of translations | Number of items | Estimated minutes to complete | Overall Quality of life                     | Pain | Fatigue | Physical functioning | Social functioning | Cognitive functioning | Emotional functioning | Shortness of breath | Cough |
| <i>General quality of life</i> |                |                                 |                        |                 |                               |                                             |      |         |                      |                    |                       |                       |                     |       |
| EORTC QLQ-C30                  | 1988           | Yes                             | 92                     | 30              | 11                            | 1                                           | 2    | 3       | 5                    | 2                  | 2                     | 4                     | 1                   |       |
| FACT-G                         | 1987           | Yes                             | 80                     | 27              | 5 to 10                       |                                             | 1    | 1       | 7                    | 7                  |                       | 6                     |                     |       |
| EQ-5D                          | 1990           | No                              | 185                    | 5               | 5                             |                                             | 1    |         | 1                    |                    |                       | 1                     |                     |       |
| SF 12                          | 2000           | No                              | 258                    | 12              | 2                             |                                             | 1    | 1       | 5                    | 1                  |                       | 4                     |                     |       |
| MDASI                          | 2000           | Yes                             | 20                     | 19              | 5                             | 1                                           | 1    | 1       | 3                    | 1                  | 1                     | 4                     | 1                   |       |
| RSCL                           | 1983           | No                              | 12                     | 38              | 8                             | 1                                           | 3    | 2       | 8                    |                    | 1                     | 7                     | 1                   |       |
| <i>Lung cancer specific</i>    |                |                                 |                        |                 |                               |                                             |      |         |                      |                    |                       |                       |                     |       |
| EORTC QLQ-L13                  | 1994           | Yes                             | 80                     | 13              | <10                           |                                             | 4    |         |                      |                    |                       |                       | 3                   | 2     |
| FACT-L                         | 1995           | Yes                             | 47                     | 9               | 8                             |                                             |      |         |                      |                    |                       |                       | 2                   | 1     |
| LCSS                           | 1993           | Yes                             | 56                     | 7               | 8                             | 1                                           | 1    | 1       |                      |                    |                       |                       | 1                   | 1     |
| MDASILC                        | 2000           | Yes                             | ?                      | 3               | ?                             |                                             |      |         |                      |                    |                       |                       |                     | 1     |

Domain covered by PROM (and number of items)

Domain not covered by PROM

LC: Lung Cancer; EORTC QLQ-C30: European Organization for Research and Treatment of Cancer Quality of Life Questionnaire - Cancer; FACT-G: Functional assessment of Cancer Therapy - General; EQ-5D: European Quality of Life Questionnaire (EuroQol EQ-5D); SF-12: Medical Outcomes Study Short Form 12-item health Survey (SF-12); MDASI: M.D. Anderson Symptom Inventory; RSCL: Rotterdam Symptom Checklist; EORTC QLQ-L13: European Organization for Research and Treatment of Cancer Quality of life Questionnaire - Lung Cancer; FACT-L: Functional Assessment of Cancer Therapy - Lung Cancer; LCSS: Lung Cancer Symptom Scale; MDASILC: M.D. Anderson Symptom Inventory - Lung Cancer; PROM: Patient-reported Outcome Measure
